# Supplementary material
Source: PubMed Central journal article supplement (PMC5899278)
Supplement: Supp_Table1.pdf [file Supp_Table1.pdf]

## Supplementary Data

SUPPLEMENTARY TABLE S1. HYPOTHESIS CATALOGUE USED TO DEFINE THE MORPHOLOGIC CRITERIA OF LESION ACTIVITY IN NON-NAIVE NEOVASCULAR AGE-RELATED MACULAR DEGENERATION PATIENT

| <i>CFP</i>                                                                                                 | <i>FA</i>                  | <i>ICGA</i>                    | <i>OCT</i>                 | <i>OCTA</i>               |
|------------------------------------------------------------------------------------------------------------|----------------------------|--------------------------------|----------------------------|---------------------------|
| 1. Morphological features indicating the presence of active (naive/treated) CNV detectable with:           |                            |                                |                            |                           |
| Hemorrhage                                                                                                 | Hemorrhage                 | Type 1 CNV                     | Hemorrhage                 | Branching                 |
| Hard exudates                                                                                              | Exudates                   | Type 2 CNV                     | Exudates                   | Anastomoses               |
| SRF                                                                                                        | Type 2 CNV                 | RAP network                    | Type 2 CNV                 | Loops                     |
| sPED                                                                                                       | Dye leakage (SRF)          | IPCV network                   | SRF                        | Perilesional halo         |
|                                                                                                            | Dye pooling (IRF)          | sPED                           | IRF                        | Flow                      |
|                                                                                                            | sPED                       | fPED                           | sPED                       |                           |
|                                                                                                            | fPED                       |                                | Solid PED                  |                           |
| 2. Identification of certain signs indicating persistence/recurrence of lesion activity with:              |                            |                                |                            |                           |
| Hemorrhage                                                                                                 | Hemorrhage                 | sPED (new onset/<br>worsening) | Hemorrhage                 | Analysis<br>not validated |
| SRF                                                                                                        | Dye leakage (SRF)          |                                | SRF                        |                           |
| sPED (new onset/<br>worsening)                                                                             | Dye pooling (IRF)          |                                | IRF                        |                           |
|                                                                                                            | sPED (new onset/worsening) |                                | sPED (new onset/worsening) |                           |
| 3. Imaging technique <i>per se</i> sufficient to demonstrate signs of CNV activity persistence/recurrence: |                            |                                |                            |                           |
| Hemorrhage                                                                                                 |                            |                                | SRF                        |                           |
|                                                                                                            |                            |                                | IRF                        |                           |
|                                                                                                            |                            |                                | sPED (new onset/worsening) |                           |

CFP, color fundus photography; CNV, choroidal neovascularization; FA, fluorescein angiography; fPED, fibrovascular PED; ICGA, indocyanine green angiography; IRF, intraretinal fluid; OCT, optical coherence tomography; OCT-A, OCT angiography; PED, pigment epithelium detachment; sPED, serous PED; SRF, subretinal fluid.
